# Supplementary material for: The effect of hypomagnetic field on survival and mitochondrial functionality of active Paramacrobiotus experimentalis females and males of different age
Source: Front Physiol. 2023 Sep 8;14:1253483. doi: 10.3389/fphys.2023.1253483 (PMC10514487; doi:10.3389/fphys.2023.1253483)
Supplement: Supplementary file 1 [file Table2.XLSX]

## Sheet: tabela
	Age	Duration	SMF_Males_Groups
1	150-180 days	15 days	14.6667
2	150-180 days	30 days	14.6667
3	150-180 days	7 days	15
4	30-60 days	15 days	14.6667
5	30-60 days	30 days	14.3333
6	30-60 days	7 days	15
7	from300 days	15 days	14.3333
8	from300 days	30 days	14
9	from300 days	7 days	14.6667
		ANOVA¹: Analiza wariancji z zastosowaniem wyrównanej transformacji rang
		SMF_Males_Groups
			Df	Df,res	F value	Pr(>F)
		Age	2	18	1.54414	0.24048
		Duration	2	18	4.72815	0.02237	*
		Age:Duration	4	18	0.82802	0.52456
		Wyniki post hoc, test Tukeya (α=0,05)
			Age
		Duration	150-180 days	30-60 days	from300 days
		15 days	14.6667	14.6667	14.3333	14.5556	AB
		30 days	14.6667	14.3333	14	14.3333	A
		7 days	15	15	14.6667	14.8889	B
			14.7778	14.6667	14.3333
			A	A	A
		Kody różnic istotnych statystycznie: 0 '***'; 0,001 '**'; 0,01 '*'; 0,05 '.'; 0.1 '1'

## Sheet: opis
W celu oceny wpływu terminu podkrzesywania drzew oraz zastosowania lub braku zabiegu zabezpieczania gałęzi/wysokości/pierśnicy na procent zarośnięcia gałęzi w kolejnych latach, przeprowadzono analizę wariancji (ANOVA) jednoczynnikową (dwuczynnikową) po wcześniejszym przeprowadzeniu testu Bartletta. Jeśli stwierdzono istotne różnice związane z badanym czynnikiem eksperymentalnym, przeprowadzono wi…
Jeżeli nie spełniono warunków niezbędnych do przeprowadzenia ANOVA, zastosowano podejście oparte na wyrównanej transformacji rang (ang. "aligned rank transform"), dostępne w pakiecie ARTool dla oprogramowania R. Ta metoda składa się z dwóch etapów analizy: na początku dane dla każdego efektu głównego oraz interakcji są wyrównywane (aligned), a następnie dokonywane jest rangowanie przekształconych…

## Sheet: RAW DATA
Raw data of HMF treatment effect on the survival rate
		SMF_ FEMALES_GROUPS					SMF_MALES_GROUPS
		Age	duration of treatment	R	active animals after treatment		Age	duration of treatment	R	active animals after treatment
		30-60 days	7 days	R1	15		30-60 days	7 days	R1	15
		30-60 days	7 days	R2	15		30-60 days	7 days	R2	15
		30-60 days	7 days	R3	15		30-60 days	7 days	R3	15
		30-60 days	15 days	R1	15		30-60 days	15 days	R1	15
		30-60 days	15 days	R2	15		30-60 days	15 days	R2	14
		30-60 days	15 days	R3	15		30-60 days	15 days	R3	15
		30-60 days	30 days	R1	15		30-60 days	30 days	R1	14
		30-60 days	30 days	R2	14		30-60 days	30 days	R2	14
		30-60 days	30 days	R3	14		30-60 days	30 days	R3	15
		150-180 days	7 days	R1	15		150-180 days	7 days	R1	15
		150-180 days	7 days	R2	15		150-180 days	7 days	R2	15
		150-180 days	7 days	R3	15		150-180 days	7 days	R3	15
		150-180 days	15 days	R1	15		150-180 days	15 days	R1	14
		150-180 days	15 days	R2	15		150-180 days	15 days	R2	15
		150-180 days	15 days	R3	15		150-180 days	15 days	R3	15
		150-180 days	30 days	R1	15		150-180 days	30 days	R1	15
		150-180 days	30 days	R2	15		150-180 days	30 days	R2	14
		150-180 days	30 days	R3	14		150-180 days	30 days	R3	15
		>300 days	7 days	R1	15		>300 days	7 days	R1	14
		>300 days	7 days	R2	15		>300 days	7 days	R2	15
		>300 days	7 days	R3	15		>300 days	7 days	R3	15
		>300 days	15 days	R1	14		>300 days	15 days	R1	14
		>300 days	15 days	R2	15		>300 days	15 days	R2	15
		>300 days	15 days	R3	15		>300 days	15 days	R3	14
		>300 days	30 days	R1	15		>300 days	30 days	R1	14
		>300 days	30 days	R2	14		>300 days	30 days	R2	14
		>300 days	30 days	R3	14		>300 days	30 days	R3	14
		HMF_FEMALES_GROUPS					HMF_MALES-GROUPS
		Age	duration of treatment	R	active animals after treatment		Age	duration of treatment	R	active animals after treatment
		30-60 days	7 days	R1	15		30-60 days	7 days	R1	15
		30-60 days	7 days	R2	15		30-60 days	7 days	R2	15
		30-60 days	7 days	R3	15		30-60 days	7 days	R3	15
		30-60 days	15 days	R1	15		30-60 days	15 days	R1	14
		30-60 days	15 days	R2	14		30-60 days	15 days	R2	15
		30-60 days	15 days	R3	14		30-60 days	15 days	R3	14
		30-60 days	30 days	R1	14		30-60 days	30 days	R1	13
		30-60 days	30 days	R2	13		30-60 days	30 days	R2	13
		30-60 days	30 days	R3	14		30-60 days	30 days	R3	14
		150-180 days	7 days	R1	15		150-180 days	7 days	R1	15
		150-180 days	7 days	R2	15		150-180 days	7 days	R2	15
		150-180 days	7 days	R3	15		150-180 days	7 days	R3	15
		150-180 days	15 days	R1	15		150-180 days	15 days	R1	14
		150-180 days	15 days	R2	14		150-180 days	15 days	R2	15
		150-180 days	15 days	R3	15		150-180 days	15 days	R3	14
		150-180 days	30 days	R1	14		150-180 days	30 days	R1	14
		150-180 days	30 days	R2	14		150-180 days	30 days	R2	14
		150-180 days	30 days	R3	15		150-180 days	30 days	R3	14
		>300 days	7 days	R1	15		>300 days	7 days	R1	14
		>300 days	7 days	R2	14		>300 days	7 days	R2	14
		>300 days	7 days	R3	15		>300 days	7 days	R3	15
		>300 days	15 days	R1	14		>300 days	15 days	R1	14
		>300 days	15 days	R2	14		>300 days	15 days	R2	14
		>300 days	15 days	R3	15		>300 days	15 days	R3	14
		>300 days	30 days	R1	14		>300 days	30 days	R1	13
		>300 days	30 days	R2	13		>300 days	30 days	R2	13
		>300 days	30 days	R3	13		>300 days	30 days	R3	13

## Sheet: ANOVA
Statistical analysis of HMF treatment effect on the survival rate.
		ANOVA: Analysis of variance using aligned rank transformation
		SMF_Females_Groups
			Df	Df,res	F value	Pr(>F)
		Age	2	18	1.54414	0.24048
		Duration	2	18	2.72815	0.07237
		Age:Duration	4	18	0.82802	0.52456
		Results of Tukey post-hoc test (α=0,05)
			Age
		Duration	150-180 days	30-60 days	> 300 days
		15 days	15	15	14.6667	14.8889	a
		30 days	14.6667	14.3333	14.3333	14.4444	a
		7 days	15	15	15	15	a
			14.8889	14.7778	14.6667
			a	a	a
		ANOVA: Analysis of variance using aligned rank transformation
		SMF_Males_Groups
			Df	Df,res	F value	Pr(>F)
		Age	2	18	2.61997	0.100309
		Duration	2	18	2.88062	0.082154
		Age:Duration	4	18	0.32081	0.86032
		Results of Tukey post-hoc test (α=0,05)
			Age
		Duration	150-180 days	30-60 days	> 300 days
		15 days	14.6667	14.6667	14.3333	14.5556	a
		30 days	14.6667	14.3333	14	14.3333	a
		7 days	15	15	14.6667	14.8889	a
			14.7778	14.6667	14.3333
			a	a	a
		ANOVA: Analysis of variance using aligned rank transformation
		HMF_Females_Group
			Df	Df,res	F value	Pr(>F)
		Age	2	18	2.03205	0.160058
		Duration	2	18	11.2676	0.00067138	***
		Age:Duration	4	18	0.48807	0.744431
		Results of Tukey post-hoc test (α=0,05)
			Age
		Duration	150-180 days	30-60 days	> 300 days
		15 days	14.6667	14.3333	14.3333	14.4444	a
		30 days	14.3333	13.6667	13.3333	13.7778	b
		7 days	15	15	14.6667	14.8889	a
			14.6667	14.3333	14.1111
			a	a	a
		ANOVA: Analysis of variance using aligned rank transformation
		SMF_Males_Groups
			Df	Df,res	F value	Pr(>F)
		Age	2	18	11.7067	0.00055359	***
		Duration	2	18	22.9695	1.1106e-05	***
		Age:Duration	4	18	1.5655	0.226266
		Results of Tukey post-hoc test (α=0,05)
			Age
		Duration	150-180 days	30-60 days	> 300 days
		15 days	14.3333	14.3333	14	14.2222	a
		30 days	14	13.3333	13	13.4444	b
		7 days	15	15	14.3333	14.7778	a
			14.4444	14.2222	13.7778
			a	a	b
		Codes of satistically significant differences: 0 '***'; 0,001 '**'; 0,01 '*'; 0,05 ','; 0,1 '1'

## Sheet: FEMALES vs MALES
Comparison between females and males in terms of SMF or HMF treatment effects on the survival rate using unpaired t-tes t. NS, not statistically significant. When the values for females and males were identical the analysis was not performed ( “-” in the table).
		SMF (control)
		Age class	duration of treatment	P value	Significance level	t-score	df	SE of difference	95% confidence interval is from
			7 days	-	-	-	-	-	-
		30-60 days	15 days	0.3309	NS	1.1056	4	0.271	-0.45 to 1.05
			30 days	-	-	-	-	-	-
			7 days	-	-	-	-	-	-
		150-180 days	15 days	0.3309	NS	1.1056	4	0.271	-0.45 to 1.05
			30 days	-	-	-	-	-	-
			7 days	0.3309	NS	1.1056	4	0.271	-0.45 to 1.05
		>300 days	15 days	0.3896	NS	0.9642	4	0.384	-0.70 to 1.44
			30 days	0.2908	NS	1.2161	4	0.271	-0.42 to 1.08
		HMF
		Age class	duration of treatment	P value	Significance level	t-score	df	SE of difference	95% confidence interval is from
			7 days	-	-	-	-	-	-
		30-60 days	15 days	-	-		-	-	-
			30 days	0.4257	NS	0.886	4	0.384	-0.73 to 1.41
			7 days	-	-	-	-	-	-
		150-180 days	15 days	0.3896	NS	0.9642	4	0.384	-0.70 to 1.44
			30 days	0.2908	NS	1.2161	4	0.271	-0.42 to 1.08
			7 days	0.3896	NS	0.9642	4	0.384	-0.70 to 1.44
		>300 days	15 days	0.2908	NS	1.2161	4	0.271	-0.42 to 1.08
			30 days	0.2908	NS	1.2161	4	0.271	-0.42 to 1.08

## Sheet: SMF vs HMF
Comparison of SMF and HMF treatments on the survival rate of females or males using unpaired t-test. *** and NS denotes p < 0.001 and not statistically significant, respectively. When the values for control and experimental groups were identical the analysis was not performed ( “-” in the table).
		FEMALES
		Age class	duration of treatment	P value	Significance level	t-score	df	SE of difference	95% confidence interval is from
			7 days	-	-	-	-	-	-
		30-60 days	15 days	0.694	NS	2.46	4	0.27	-0.09 to 1.43
			30 days	0.1583	NS	1.73	4	0.39	-0.40 to 1.73
			7 days		-		-	-	-
		150-180 days	15 days	0.2879	NS	1.22	4	0.27	-0.42 to 1.09
			30 days	0.4341	NS	0.87	4	0.39	-0.73 to 1.40
			7 days	0.2879	NS	1.22	4	0.27	-0.42 to 1.09
		>300 days	15 days	0.4303	NS	0.88	4	0.39	-0.73 to 1.40
			30 days	0.06	NS	2.6	4	0.39	-0.07 to 2.07
		MALES
		Age class	duration of treatment	P value	Significance level	t-score	df	SE of difference	95% confidence interval is from
			7 days	-	-	-	-	-	-
		30-60 days	15 days	0.4266	NS	0.88	4	0.39	-0.73 to 1.41
			30 days	0.06	NS	2.6	4	0.39	-0.07 to 2.07
			7 days	-	-	-	-	-	-
		150-180 days	15 days	0.4266	NS	0.88	4	0.39	-0.73 to 1.41
			30 days	0.0694	NS	2.46	4	0.27	-0.09 to 1.43
			7 days	0.4266	NS	0.88	4	0.39	-0.73 to 1.41
		>300 days	15 days	0.2917	NS	1.21	4	0.27	-0.43 to 1.09
			30 days	0.0001	***	12.47	4	0.01	0.98 to 1.02
