# Supplementary material for: The effect of hypomagnetic field on survival and mitochondrial functionality of active Paramacrobiotus experimentalis females and males of different age
Source: Front Physiol. 2023 Sep 8;14:1253483. doi: 10.3389/fphys.2023.1253483 (PMC10514487; doi:10.3389/fphys.2023.1253483)
Supplement: Supplementary file 2 [file Table3.XLSX]

## Sheet: tabela
	Age	Duration	SMF_Males_Groups
1	150-180 days	15 days	14.6667
2	150-180 days	30 days	14.6667
3	150-180 days	7 days	15
4	30-60 days	15 days	14.6667
5	30-60 days	30 days	14.3333
6	30-60 days	7 days	15
7	from300 days	15 days	14.3333
8	from300 days	30 days	14
9	from300 days	7 days	14.6667
		ANOVA¹: Analiza wariancji z zastosowaniem wyrównanej transformacji rang
		SMF_Males_Groups
			Df	Df,res	F value	Pr(>F)
		Age	2	18	1.54414	0.24048
		Duration	2	18	4.72815	0.02237	*
		Age:Duration	4	18	0.82802	0.52456
		Wyniki post hoc, test Tukeya (α=0,05)
			Age
		Duration	150-180 days	30-60 days	from300 days
		15 days	14.6667	14.6667	14.3333	14.5556	AB
		30 days	14.6667	14.3333	14	14.3333	A
		7 days	15	15	14.6667	14.8889	B
			14.7778	14.6667	14.3333
			A	A	A
		Kody różnic istotnych statystycznie: 0 '***'; 0,001 '**'; 0,01 '*'; 0,05 '.'; 0.1 '1'

## Sheet: opis
W celu oceny wpływu terminu podkrzesywania drzew oraz zastosowania lub braku zabiegu zabezpieczania gałęzi/wysokości/pierśnicy na procent zarośnięcia gałęzi w kolejnych latach, przeprowadzono analizę wariancji (ANOVA) jednoczynnikową (dwuczynnikową) po wcześniejszym przeprowadzeniu testu Bartletta. Jeśli stwierdzono istotne różnice związane z badanym czynnikiem eksperymentalnym, przeprowadzono wi…
Jeżeli nie spełniono warunków niezbędnych do przeprowadzenia ANOVA, zastosowano podejście oparte na wyrównanej transformacji rang (ang. "aligned rank transform"), dostępne w pakiecie ARTool dla oprogramowania R. Ta metoda składa się z dwóch etapów analizy: na początku dane dla każdego efektu głównego oraz interakcji są wyrównywane (aligned), a następnie dokonywane jest rangowanie przekształconych…

## Sheet: RAW DATA
Raw data of HMF treatment effect on the mitochondrial inner membrane potential.
		SMF_ FEMALES_GROUPS					SMF_MALES_GROUPS
		Age	duration of treatment	R	FITMRM/animal		Age	duration of treatment	R	FITMRM/animal
		30-60 days	7 days	R1	361.66		30-60 days	7 days	R1	239.72
		30-60 days	7 days	R2	353.76		30-60 days	7 days	R2	250.92
		30-60 days	7 days	R3	330.81		30-60 days	7 days	R3	263.92
		30-60 days	15 days	R1	380.8		30-60 days	15 days	R1	256.53
		30-60 days	15 days	R2	340.78		30-60 days	15 days	R2	247.91
		30-60 days	15 days	R3	324.51		30-60 days	15 days	R3	249.07
		30-60 days	30 days	R1	349.17		30-60 days	30 days	R1	251.13
		30-60 days	30 days	R2	364.44		30-60 days	30 days	R2	239.4
		30-60 days	30 days	R3	331.46		30-60 days	30 days	R3	262.52
		150-180 days	7 days	R1	552.3		150-180 days	7 days	R1	368.48
		150-180 days	7 days	R2	514.5		150-180 days	7 days	R2	394.59
		150-180 days	7 days	R3	534.46		150-180 days	7 days	R3	360.79
		150-180 days	15 days	R1	512.92		150-180 days	15 days	R1	367.27
		150-180 days	15 days	R2	556.82		150-180 days	15 days	R2	374.84
		150-180 days	15 days	R3	528.2		150-180 days	15 days	R3	381.14
		150-180 days	30 days	R1	539.58		150-180 days	30 days	R1	383.92
		150-180 days	30 days	R2	536.15		150-180 days	30 days	R2	368.59
		150-180 days	30 days	R3	520.16		150-180 days	30 days	R3	369.92
		>300 days	7 days	R1	469.78		>300 days	7 days	R1	319.38
		>300 days	7 days	R2	484.24		>300 days	7 days	R2	308.65
		>300 days	7 days	R3	473.28		>300 days	7 days	R3	296.33
		>300 days	15 days	R1	483.04		>300 days	15 days	R1	307.97
		>300 days	15 days	R2	469.12		>300 days	15 days	R2	325.13
		>300 days	15 days	R3	473.2		>300 days	15 days	R3	290.4
		>300 days	30 days	R1	468.24		>300 days	30 days	R1	298.22
		>300 days	30 days	R2	484.32		>300 days	30 days	R2	311.98
		>300 days	30 days	R3	470.2		>300 days	30 days	R3	312.68
		HMF_FEMALES_GROUPS					HMF_MALES-GROUPS
		Age	duration of treatment	R	FITMRM/animal		Age	duration of treatment	R	FITMRM/animal
		30-60 days	7 days	R1	302.03		30-60 days	7 days	R1	227.86
		30-60 days	7 days	R2	313.01		30-60 days	7 days	R2	209.92
		30-60 days	7 days	R3	290.17		30-60 days	7 days	R3	235.05
		30-60 days	15 days	R1	296.51		30-60 days	15 days	R1	206.97
		30-60 days	15 days	R2	312.34		30-60 days	15 days	R2	195.57
		30-60 days	15 days	R3	284.01		30-60 days	15 days	R3	184.14
		30-60 days	30 days	R1	287.23		30-60 days	30 days	R1	195.67
		30-60 days	30 days	R2	272.91		30-60 days	30 days	R2	196.57
		30-60 days	30 days	R3	262.8		30-60 days	30 days	R3	185.08
		150-180 days	7 days	R1	507.94		150-180 days	7 days	R1	370.62
		150-180 days	7 days	R2	470.56		150-180 days	7 days	R2	358.29
		150-180 days	7 days	R3	494.32		150-180 days	7 days	R3	359.57
		150-180 days	15 days	R1	486.86		150-180 days	15 days	R1	351.05
		150-180 days	15 days	R2	475.32		150-180 days	15 days	R2	335.02
		150-180 days	15 days	R3	475.76		150-180 days	15 days	R3	334.33
		150-180 days	30 days	R1	442.24		150-180 days	30 days	R1	337.06
		150-180 days	30 days	R2	463.08		150-180 days	30 days	R2	324.7
		150-180 days	30 days	R3	481.52		150-180 days	30 days	R3	331.33
		>300 days	7 days	R1	400.42		>300 days	7 days	R1	286.65
		>300 days	7 days	R2	377.8		>300 days	7 days	R2	272.32
		>300 days	7 days	R3	380.02		>300 days	7 days	R3	267.54
		>300 days	15 days	R1	394.82		>300 days	15 days	R1	268.13
		>300 days	15 days	R2	369.06		>300 days	15 days	R2	252.32
		>300 days	15 days	R3	360.64		>300 days	15 days	R3	231.24
		>300 days	30 days	R1	360.62		>300 days	30 days	R1	254.03
		>300 days	30 days	R2	340.88		>300 days	30 days	R2	222.87
		>300 days	30 days	R3	329.24		>300 days	30 days	R3	206.49

## Sheet: ANALYSIS
Statistical analysis of HMF treatment effect on the mitochondrial inner membrane potential.
		ANOVA
		SMF_Females_Groups
			Df	Df,res	F value	Pr(>F)
		Age	2	18	285.8045	2.303E-14	***
		Duration	2	18	0.0122	0.9879
		Age:Duration	4	18	0.0016	1.0000
		Results of Tukey post-hoc test (α=0,05)
			Age
		Duration	150-180 days	30-60 days	> 300 days
		15 days	532.64	348.7	475.12	452.153	a
		30 days	531.96	348.36	474.25	451.523	a
		7 days	533.75	348.74	475.77	452.753	a
			532.783	348.6	475.047
			a	c	b
		ANOVA
		SMF_Males_Groups
			Df	Df,res	F value	Pr(>F)
		Age	2	18	248.776	7.712E-14	***
		Duration	2	18	0.004	0.996
		Age:Duration	4	18	0.000	1.000
		Results of Tukey post-hoc test (α=0,05)
			Age
		Duration	150-180 days	30-60 days	> 300 days
		15 days	377.42	251.17	307.83	312.14	a
		30 days	374.14	251.02	307.63	310.93	a
		7 days	374.62	251.52	308.12	311.42	a
			375.393	251.237	307.86
			a	c	b
		ANOVA
		HMF_Females_Group
			Df	Df,res	F value	Pr(>F)
		Age	2	18	356.0079	3.369E-15	***
		Duration	2	18	11.7166	0.0005512	***
		Age:Duration	4	18	0.3132	0.8653620
		Results of Tukey post-hoc test (α=0,05)
			Age
		Duration	150-180 days	30-60 days	> 300 days
		15 days	479.31	297.62	374.84	383.923	a
		30 days	462.28	274.31	343.58	360.057	b
		7 days	490.94	301.74	386.08	392.92	a
			477.51	291.223	368.167
			a	c	b
		ANOVA
		HMF_Males_Group
			Df	Df,res	F value	Pr(>F)
		Age	2	18	269.6930	3.820E-14	***
		Duration	2	18	18.9799	3.686E-05	***
		Age:Duration	4	18	0.5703	0.6875
		Results of Tukey post-hoc test (α=0,05)
			Age
		Duration	150-180 days	30-60 days	> 300 days
		15 days	340.13	195.56	250.56	262.083	b
		30 days	331.03	192.44	227.8	250.423	b
		7 days	362.83	224.28	275.5	287.537	a
			344.663	204.093	251.287
			a	c	b
		Codes of satistically significant differences: 0 '***'; 0,001 '**'; 0,01 '*'; 0,05 ','; 0,1 '1'

## Sheet: FEMALES vs MALES
Comparison between females and males in terms of SMF or HMF treatment effects on Δψ levels using unpaired t-test. ** and *** denotes p < 0.01, p < 0.001, respectively.
		SMF (control)
		Age class	duration of treatment	P value	Significance level	t-score	df	SE of difference	95% confidence interval is from
			7 days	0.0005	***	10.2689	4	9.467	70.93 to 123.50
		30-60 days	15 days	0.002	**	7.128	4	13.649	59.39 to 135.19
			30 days	0.0005	***	10.2449	4	9.501	70.96 to 123.72
			7 days	0.0002	***	13.0415	4	12.217	125.41 to 193.25
		150-180 days	15 days	0.0001	***	14.3768	4	11.006	127.67 to 188.79
			30 days	0.0001	***	24.9956	4	6.314	140.29 to 175.35
			7 days	0.0001	***	25.7992	4	6.498	149.61 to 185.69
		>300 days	15 days	0.0001	***	18.8944	4	8.854	142.71 to 191.87
			30 days	0.0001	***	29.5128	4	5.646	150.95 to 182.29
		HMF
		Age class	duration of treatment	P value	Significance level	t-score	df	SE of difference	95% confidence interval is from
			7 days	0.0007	***	9.5161	4	8.14	54.86 to 100.06
		30-60 days	15 days	0.0003	***	11.8859	4	8.587	78.22 to 125.90
			30 days	0.0002	***	6.523	4	12.551	63.76 to 99.98
			7 days	0.0002	***	13.5096	4	9.492	101.88 to 154.60
		150-180 days	15 days	0.0001	***	25.6812	4	5.42	124.13 to 154.23
			30 days	0.0002	***	13.5186	4	9.709	104.29 to 158.20
			7 days	0.0001	***	14.7071	4	7.518	89.70 to 131.44
		>300 days	15 days	0.0005	***	10.2653	4	12.107	90.67 to 157.89
			30 days	0.0011	**	8.5002	4	13.621	77.96 to 153.60

## Sheet: SMF vs HMF
Comparison of effects of SMF and HMF treatments on Δψ levels of females or males using unpaired t-test. *, **, ***, NS denotes p < .0.05, p < 0.01, p < 0.001 and not statistically significant, respectively.
		FEMALES
		Age class	duration of treatment	P value	Significance level	t-score	df	SE of difference	95% confidence interval is from
			7 days	0.0071	**	5.07	4	9.28	21.25 to 72.76
		30-60 days	15 days	0.0283	*	3.36	4	15.21	8.85 to 93.30
			30 days	0.0016	**	7.64	4	9.7	47.12 to 100.97
			7 days	0.0271	*	3.4	4	12.61	7.80 to 77.82
		150-180 days	15 days	0.0082	**	4.87	4	10.95	22.94 to 83.73
			30 days	0.0027	**	6.65	4	10.47	40.60 to 98.76
			7 days	0.0002	***	13.06	4	6.87	70.61 to 108.76
		>300 days	15 days	0.0004	***	11.08	4	9.05	75.16 to 125.40
			30 days	0.0001	***	15.29	4	8.55	106.95 to 154.40
		MALES
		Age class	duration of treatment	P value	Significance level	t-score	df	SE of difference	95% confidence interval is from
			7 days	0.0311	*	3.26	4	8.36	4.04 to 50.44
		30-60 days	15 days	0.0007	***	9.56	4	5.82	39.46 to 71.76
			30 days	0.0007	***	9.41	4	6.23	41.29 to 75.86
			7 days	0.2577	NS	1.32	4	8.94	-13.03 to 36.62
		150-180 days	15 days	0.0034	**	6.2	4	5.53	18.92 to 49.64
			30 days	0.001	***	8.7	4	4.95	29.36 to 56.86
			7 days	0.0105	*	4.54	4	7.18	12.68 to 52.55
		>300 days	15 days	0.0087	**	4.79	4	11.96	24.05 to 90.49
			30 days	0.0027	**	6.64	4	12.02	46.47 to 113.19
